# Supplementary material for: Computed Tomography Does Not Improve Intra- and Interobserver Agreement of Hertel Radiographic Prognostic Criteria
Source: MDPI journal article supplement (doi:10.3390/medicina58101489), 2022-10-19
Supplement: s1 [file s1]

Individual folders with instructions on how to respond the survey:

- This study seeks to evaluate Hertel's radiographic criteria using computed tomography (CT);
- We separated 20 cases of fractures of the proximal humerus, with X-rays and CT images, individualized in a separate folder;
- Randomization was performed, and the cases were numbered from 1 to 20;
- We ask that each examiner define which Hertel criteria are present by evaluating the radiographs and then their respective CT scans;
- At the end of the evaluation, each examiner will have made 40 evaluations. 2 for each case;
- In the folder with the files there is a photo explaining each of the 3 Hertel criteria, (reproduced from these author original article);
- We kindly ask you to return these results for each patient. Example:

Case 1: X-ray 1

- criterion A present/absent/cannot evaluate;
- criterion B present/absent/cannot evaluate;
- criterion C present/absent/cannot evaluate;

CT 1

- criterion A present/absent/cannot evaluate;
- criterion B present/absent/cannot evaluate;
- criterion C present/absent/cannot evaluate;

- The annotation of these results can be done in the way that suits the examiner. Annotated on a sheet of paper, or in an Excell table, or in a .doc text;
- After ending with the document, please send it to the emails: [p\\_tullio@hotmail.com](mailto:p_tullio@hotmail.com) and [v\\_giordano@me.com](mailto:v_giordano@me.com);
- Very soon we will send the same cases again but with a new randomization for a second evaluation, allowing us to make an intra and interobserver agreement comparison.

Thanks a lot in advance.

Best regards.

Paulo and Vincenzo
