# Supplementary material for: Computed Tomography Does Not Improve Intra- and Interobserver Agreement of Hertel Radiographic Prognostic Criteria
Source: MDPI journal article supplement (doi:10.3390/medicina58101489), 2022-10-19
Supplement: s1 [file s1]

**Supplementary Material Table S2.** Interobserver analysis in relation to STANDARD: percentage of cases in agreement with prognostic criteria A, B, and C by radiography and CT of the evaluators in round R1.

| Evaluator  | Variable | Agreement P (%) | Agreement A (%) | Agreement I (%) | Agreement G (%) | Kappa   | p-value      |
|------------|----------|-----------------|-----------------|-----------------|-----------------|---------|--------------|
| SHOULDER 1 | X-ray C1 | 0.0             | 55.6            | 75.0            | 40.0            | 0.12    | 0.38         |
|            | X-ray C2 | 0.68            | 26.7            | 100             | 40.0            | 0.19    | 0.06         |
|            | X-ray C3 | 0.0             | 81.3            | 33.3            | 70.0            | 0.17    | 0.37         |
|            | CT C1    | 11.1            | 72.7            | n/p             | 54.0            | 0.0     | 0.98         |
|            | CT C2    | 40.0            | 26.7            | n/p             | 30.0            | "-0.10" | 0.47         |
|            | CT C3    | 0.0             | 94.4            | n/p             | 85.0            | "-0.07" | 0.73         |
| SHOULDER 2 | X-ray C1 | 42.9            | 66.7            | 25.0            | 50.0            | 0.19    | 0.24         |
|            | X-ray C2 | 33.3            | 53.3            | 0.0             | 45.0            | 0.0     | 0.98         |
|            | X-ray C3 | 100             | 62.5            | 33.3            | 60.0            | 0.22    | 0.14         |
|            | CT C1    | 22.2            | 72.7            | n/p             | 50.0            | "-0.05" | 0.80         |
|            | CT C2    | 40.0            | 46.7            | n/p             | 45.0            | "-0.10" | 0.61         |
|            | CT C3    | 50.0            | 88.9            | n/p             | 85.0            | 0.32    | 0.14         |
| SHOULDER 3 | X-ray C1 | 14.3            | 55.6            | 50.0            | 40.0            | 0.05    | 0.74         |
|            | X-ray C2 | 33.3            | 33.3            | 0.0             | 30.0            | "-0.09" | 0.44         |
|            | X-ray C3 | 100             | 93.8            | 0.0             | 80.0            | 0.26    | 0.10         |
|            | CT C1    | 44.4            | 36.4            | n/p             | 40.0            | "-0.19" | 0.39         |
|            | CT C2    | 40.0            | 26.7            | n/p             | 30.0            | "-0.22" | 0.18         |
|            | CT C3    | 0.0             | 94.4            | n/p             | 85.0            | "-0.07" | 0.73         |
| SHOULDER 4 | X-ray C1 | 14.3            | 88.9            | 0.0             | 45.0            | 0.02    | 0.87         |
|            | X-ray C2 | 0.0             | 80.0            | 0.0             | 60.0            | "-0.18" | 0.31         |
|            | X-ray C3 | 0.0             | 81.3            | 66.7            | 75.0            | 0.33    | 0.058        |
|            | CT C1    | 22.2            | 100             | n/p             | 65.0            | 0.24    | 0.099        |
|            | CT C2    | 0.0             | 80.0            | n/p             | 60.0            | "-0.23" | 0.28         |
|            | CT C3    | 0.0             | 83.3            | n/p             | 75.0            | "-0.14" | 0.53         |
| TRAUMA 1   | X-ray C1 | 71.4            | 44.4            | 25.0            | 50.0            | 0.22    | 0.18         |
|            | X-ray C2 | 66.7            | 13.3            | 0.0             | 20.0            | 0.00    | 0.97         |
|            | X-ray C3 | 0.0             | 81.3            | 33.3            | 70.0            | 0.10    | 0.57         |
|            | CT C1    | 66.7            | 18.2            | n/p             | 40.0            | 0.04    | 0.76         |
|            | CT C2    | 60.0            | 26.7            | n/p             | 35.0            | 0.07    | 0.52         |
|            | CT C3    | 50.0            | 72.2            | n/p             | 70.0            | 0.17    | 0.18         |
| TRAUMA 2   | X-ray C1 | 71.4            | 44.4            | 0.0             | 45.0            | 0.10    | 0.54         |
|            | X-ray C2 | 33.3            | 46.7            | 0.0             | 40.0            | "-0.03" | 0.81         |
|            | X-ray C3 | 0.0             | 81.3            | 0.0             | 65.0            | 0.00    | 1.00         |
|            | CT C1    | 66.7            | 45.5            | n/p             | 55.0            | 0.12    | 0.58         |
|            | CT C2    | 40.0            | 40.0            | n/p             | 40.0            | "-0.14" | 0.44         |
|            | CT C3    | 50.0            | 88.9            | n/p             | 85.0            | 0.32    | 0.14         |
| TRAUMA 3   | X-ray C1 | 85.7            | 33.3            | 25.0            | 50.0            | 0.23    | 0.07         |
|            | X-ray C2 | 66.7            | 20.0            | 0.0             | 25.0            | 0.02    | 0.84         |
|            | X-ray C3 | 0.0             | 87.5            | 66.7            | 80.0            | 0.40    | <b>0.029</b> |
|            | CT C1    | 78.8            | 27.3            | n/p             | 50.0            | 0.10    | 0.56         |
|            | CT C2    | 80.0            | 20.0            | n/p             | 35.0            | 0.00    | 1.00         |
|            | CT C3    | 0.0             | 77.8            | n/p             | 70.0            | "-0.11" | 0.48         |
| TRAUMA 4   | X-ray C1 | 14.3            | 66.7            | 75.0            | 50.0            | 0.19    | 0.21         |
|            | X-ray C2 | 33.3            | 33.3            | 0.0             | 30.0            | "-0.04" | 0.72         |
|            | X-ray C3 | 0.0             | 56.3            | 66.7            | 55.0            | 0.21    | 0.12         |
|            | CT C1    | 33.3            | 63.6            | n/p             | 50.0            | "-0.03" | 0.89         |
|            | CT C2    | 60.0            | 33.3            | n/p             | 40.0            | "-0.04" | 0.79         |
|            | CT C3    | 50.0            | 77.8            | n/p             | 75.0            | 0.17    | 0.39         |

Source: SOT-Nova, HMMC, 2022.

Legends: R1 – round 1; % – percentage; P – present; A – absent; I – inconclusive; G – general; X-ray – radiography; CT – computed tomography; C1 – criterion A; C2 – criterion B; C3 – criterion C; n/p – not processed.
