# Supplementary material for: Computed Tomography Does Not Improve Intra- and Interobserver Agreement of Hertel Radiographic Prognostic Criteria
Source: MDPI journal article supplement (doi:10.3390/medicina58101489), 2022-10-19
Supplement: s1 [file s1]

**Supplementary Material Table S3.** Interobserver analysis in relation to STANDARD: percentage of cases in agreement with prognostic criteria A, B, and C by radiography and CT of the evaluators in round R2.

| Evaluator  | Variable | Agreement P (%) | Agreement A (%) | Agreement I (%) | Agreement G (%) | Kappa   | p-value       |
|------------|----------|-----------------|-----------------|-----------------|-----------------|---------|---------------|
| SHOULDER 1 | X-ray C1 | 0.0             | 66.7            | 100             | 50.0            | 0.30    | <b>0.019</b>  |
|            | X-ray C2 | 6.67            | 40.0            | 100             | 50.0            | 0.27    | <b>0.023</b>  |
|            | X-ray C3 | 0.0             | 93.8            | 66.7            | 85.0            | 0.50    | <b>0.011</b>  |
|            | CT C1    | 33.3            | 54.5            | n/p             | 45.0            | 0.06    | 0.71          |
|            | CT C2    | 40.0            | 40.0            | n/p             | 40.0            | "-0.12" | 0.51          |
|            | CT C3    | 0.0             | 94.4            | n/p             | 85.0            | "-0.07" | 0.73          |
| SHOULDER 2 | X-ray C1 | 57.1            | 66.7            | 0.0             | 50.0            | 0.17    | 0.31          |
|            | X-ray C2 | 33.3            | 40.0            | 0.0             | 35.0            | "-0.12" | 0.42          |
|            | X-ray C3 | 0.0             | 81.3            | 33.3            | 70.0            | 0.26    | 0.13          |
|            | CT C1    | 44.4            | 72.7            | n/p             | 60.0            | 0.18    | 0.42          |
|            | CT C2    | 40.0            | 46.7            | n/p             | 45.0            | "-0.10" | 0.61          |
|            | CT C3    | 50.0            | 77.8            | n/p             | 75.0            | 0.17    | 0.39          |
| SHOULDER 3 | X-ray C1 | 85.7            | 22.2            | 25.0            | 45.0            | 0.14    | 0.30          |
|            | X-ray C2 | 66.7            | 26.7            | 0.0             | 30.0            | 0.00    | 1.00          |
|            | X-ray C3 | 0.0             | 87.5            | 0.0             | 70.0            | 0.02    | 0.88          |
|            | CT C1    | 44.4            | 18.2            | n/p             | 30.0            | "-0.36" | 0.081         |
|            | CT C2    | 80.0            | 6.7             | n/p             | 25.0            | "-0.07" | 0.39          |
|            | CT C3    | 0.0             | 94.4            | n/p             | 85.0            | "-0.07" | 0.73          |
| SHOULDER 4 | X-ray C1 | 85.7            | 11.1            | 0.0             | 35.0            | "-0.02" | 0.87          |
|            | X-ray C2 | 66.7            | 26.7            | 0.0             | 30.0            | 0.00    | 1.31          |
|            | X-ray C3 | 0.0             | 100             | 0.0             | 80.0            | n/a     | n/a           |
|            | CT C1    | 77.8            | 0.0             | n/p             | 35.0            | "-0.20" | 0.099         |
|            | CT C2    | 80.0            | 20.0            | n/p             | 35.0            | 0.00    | 1.00          |
|            | CT C3    | 0.0             | 77.8            | n/p             | 70.0            | "-0.15" | 0.46          |
| TRAUMA 1   | X-ray C1 | 85.7            | 44.4            | 25.0            | 55.0            | 0.30    | <b>0.043</b>  |
|            | X-ray C2 | 66.7            | 20.0            | 0.0             | 25.0            | 0.02    | 0.82          |
|            | X-ray C3 | 0.0             | 87.5            | 0.0             | 70.0            | 0.01    | 0.96          |
|            | CT C1    | 55.6            | 18.2            | n/p             | 35.0            | "-0.14" | 0.40          |
|            | CT C2    | 80.0            | 13.3            | n/p             | 30.0            | 0.03    | 0.69          |
|            | CT C3    | 50.0            | 88.9            | n/p             | 85.0            | 0.35    | <b>0.019</b>  |
| TRAUMA 2   | X-ray C1 | 0.0             | 88.9            | 0.0             | 40.0            | "-0.08" | 0.30          |
|            | X-ray C2 | 66.7            | 26.7            | 0.0             | 30.0            | 0.00    | 1.00          |
|            | X-ray C3 | 0.0             | 75.0            | 0.0             | 70.0            | "-0.03" | 0.81          |
|            | CT C1    | 0.0             | 90.9            | n/p             | 50.0            | "-0.10" | 0.35          |
|            | CT C2    | 80.0            | 26.7            | n/p             | 40.0            | 0.04    | 0.77          |
|            | CT C3    | 50.0            | 66.7            | n/p             | 65.0            | 0.08    | 0.64          |
| TRAUMA 3   | X-ray C1 | 100             | 55.6            | 0.0             | 60.0            | 0.35    | <b>0.015</b>  |
|            | X-ray C2 | 66.7            | 26.7            | 0.0             | 30.0            | 0.00    | 1.00          |
|            | X-ray C3 | 0.0             | 81.3            | 66.7            | 75.0            | 0.32    | 0.083         |
|            | CT C1    | 66.7            | 45.5            | n/p             | 55.0            | 0.12    | 0.58          |
|            | CT C2    | 80.0            | 26.7            | n/p             | 40.0            | 0.04    | 0.77          |
|            | CT C3    | 0.0             | 88.9            | n/p             | 80.0            | "-0.08" | 0.64          |
| TRAUMA 4   | X-ray C1 | 57.1            | 88.9            | 75.0            | 75.0            | 0.60    | <b>0.0001</b> |
|            | X-ray C2 | 66.7            | 26.7            | 0.0             | 30.0            | 0.01    | 0.95          |
|            | X-ray C3 | 100             | 31.3            | 66.7            | 40.0            | 0.16    | 0.10          |
|            | CT C1    | 55.6            | 54.5            | n/p             | 55.0            | 0.10    | 0.65          |
|            | CT C2    | 80.0            | 40.0            | n/p             | 50.0            | 0.13    | 0.42          |
|            | CT C3    | 100             | 77.8            | n/p             | 80.0            | 0.41    | <b>0.022</b>  |

Source: SOT-Nova, HMMC, 2022.

Legends: R2 – round 2; % – percentage; P – present; A – absent; I – inconclusive; G – general; X-ray – radiography; CT – computed tomography; C1 – criterion A; C2 – criterion B; C3 – criterion C; n/p – not processed; n/a – not applicable.
