# Supplementary material for: Computed Tomography Does Not Improve Intra- and Interobserver Agreement of Hertel Radiographic Prognostic Criteria
Source: MDPI journal article supplement (doi:10.3390/medicina58101489), 2022-10-19
Supplement: s1 [file s1]

**Supplementary Material Table S1.** Distribution of criterion A, B, and C by radiographic and CT images between rounds R1 and R2.

| Evaluator     | Variable | Criteria<br>(A, B, and C) | R1 |      | R2 |      | Agreement (%) | Kappa   | p-value |
|---------------|----------|---------------------------|----|------|----|------|---------------|---------|---------|
|               |          |                           | n  | %    | n  | %    |               |         |         |
| SHOULDER<br>1 | X-ray C1 | P                         | 1  | 5.0  | 2  | 10.0 | 70.0          | 0.46    | 0.009   |
|               |          | A                         | 9  | 45.0 | 6  | 30.0 |               |         |         |
|               |          | I                         | 10 | 50.0 | 12 | 60.0 |               |         |         |
|               | X-ray C2 | P                         | 13 | 65.0 | 8  | 40.0 | 75.0          | 0.61    | <0.0001 |
|               |          | A                         | 4  | 20.0 | 6  | 30.0 |               |         |         |
|               |          | I                         | 3  | 15.0 | 6  | 30.0 |               |         |         |
|               | X-ray C3 | P                         | 0  | 0.0  | 0  | 0.0  | 70.0          | 0.08    | 0.72    |
|               |          | A                         | 15 | 75.0 | 17 | 85.0 |               |         |         |
|               |          | I                         | 5  | 25.0 | 3  | 15.0 |               |         |         |
|               | CT C1    | P                         | 3  | 15.0 | 5  | 25.0 | 55.0          | 0.18    | 0.26    |
|               |          | A                         | 14 | 70.0 | 11 | 55.0 |               |         |         |
|               |          | I                         | 3  | 15.0 | 4  | 20.0 |               |         |         |
|               | CT C2    | P                         | 11 | 55.0 | 10 | 50.0 | 70.0          | 0.48    | 0.004   |
|               |          | A                         | 6  | 30.0 | 9  | 45.0 |               |         |         |
|               |          | I                         | 3  | 15.0 | 1  | 5.0  |               |         |         |
|               | CT C3    | P                         | 1  | 5.0  | 1  | 5.0  | 90.0          | “-0.05” | 0.81    |
|               |          | A                         | 19 | 95.0 | 19 | 95.0 |               |         |         |
|               |          | I                         | 0  | 0.0  | 0  | 0.0  |               |         |         |
| SHOULDER<br>2 | X-ray C1 | P                         | 6  | 30.0 | 8  | 40.0 | 80.0          | 0.65    | 0.0002  |
|               |          | A                         | 11 | 55.0 | 11 | 55.0 |               |         |         |
|               |          | I                         | 3  | 15.0 | 1  | 5.0  |               |         |         |
|               | X-ray C2 | P                         | 9  | 45.0 | 10 | 50.0 | 80.0          | 0.63    | 0.001   |
|               |          | A                         | 10 | 50.0 | 9  | 45.0 |               |         |         |
|               |          | I                         | 1  | 5.0  | 1  | 5.0  |               |         |         |
|               | X-ray C3 | P                         | 4  | 20.0 | 2  | 10.0 | 65.0          | 0.36    | 0.025   |
|               |          | A                         | 11 | 55.0 | 14 | 70.0 |               |         |         |
|               |          | I                         | 5  | 25.0 | 4  | 20.0 |               |         |         |
|               | CT C1    | P                         | 5  | 25.0 | 7  | 35.0 | 80.0          | 0.53    | 0.014   |
|               |          | A                         | 15 | 75.0 | 13 | 65.0 |               |         |         |
|               |          | I                         | 0  | 0.0  | 0  | 0.0  |               |         |         |
|               | CT C2    | P                         | 10 | 50.0 | 10 | 50.0 | 80.0          | 0.60    | 0.007   |
|               |          | A                         | 10 | 50.0 | 10 | 50.0 |               |         |         |
|               |          | I                         | 0  | 0.0  | 0  | 0.0  |               |         |         |
|               | CT C3    | P                         | 3  | 15.0 | 5  | 25.0 | 80.0          | 0.38    | 0.070   |
|               |          | A                         | 17 | 85.0 | 15 | 75.0 |               |         |         |
|               |          | I                         | 0  | 0.0  | 0  | 0.0  |               |         |         |
|               | X-ray C1 | P                         | 4  | 20.0 | 15 | 75.0 | 35.0          | 0.11    | 0.31    |
|               |          | A                         | 11 | 55.0 | 4  | 20.0 |               |         |         |
|               |          | I                         | 5  | 25.0 | 1  | 5.0  |               |         |         |
|               |          | P                         | 13 | 65.0 | 15 | 75.0 |               |         |         |

|               |          |   |    |      |    |      |       |         |         |
|---------------|----------|---|----|------|----|------|-------|---------|---------|
| SHOULDER<br>3 | X-ray C2 | A | 7  | 35.0 | 5  | 25.0 | 80.0  | 0.53    | 0.014   |
|               |          | I | 0  | 0.0  | 0  | 0.0  |       |         |         |
|               |          | P | 1  | 5.0  | 2  | 10.0 |       |         |         |
|               | X-ray C3 | A | 18 | 90.0 | 17 | 85.0 | 80.0  | 0.12    | 0.47    |
|               |          | I | 1  | 5.0  | 1  | 5.0  |       |         |         |
|               |          | P | 11 | 55.0 | 13 | 65.0 |       |         |         |
|               | CT C1    | A | 9  | 45.0 | 7  | 35.0 | 80.0  | 0.59    | 0.007   |
|               |          | I | 0  | 0.0  | 0  | 0.0  |       |         |         |
|               |          | P | 13 | 65.0 | 18 | 90.0 |       |         |         |
|               | CT C2    | A | 7  | 35.0 | 2  | 10.0 | 75.0  | 0.34    | 0.042   |
|               |          | I | 0  | 0.0  | 0  | 0.0  |       |         |         |
|               |          | P | 1  | 5.0  | 1  | 5.0  |       |         |         |
|               | CT C3    | A | 19 | 95.0 | 19 | 95.0 | 100.0 | 1.0     | <0.0001 |
|               |          | I | 0  | 0.0  | 0  | 0.0  |       |         |         |
| SHOULDER<br>4 | X-ray C1 | P | 2  | 10.0 | 18 | 90.0 |       |         |         |
|               |          | A | 18 | 90.0 | 2  | 10.0 | 0.0   | "-0.22" | 1       |
|               |          | I | 0  | 0.0  | 0  | 0.0  |       |         |         |
|               |          | P | 3  | 15.0 | 15 | 75.0 |       |         |         |
|               | X-ray C2 | A | 17 | 85.0 | 5  | 25.0 | 10.0  | "-0.33" | 1       |
|               |          | I | 0  | 0.0  | 0  | 0.0  |       |         |         |
|               |          | P | 2  | 10.0 | 0  | 0.0  | 75.0  | n/a     | n/a     |
|               | X-ray C3 | A | 15 | 75.0 | 20 | 100  |       |         |         |
|               |          | I | 3  | 15.0 | 0  | 0.0  |       |         |         |
|               |          | P | 2  | 10.0 | 18 | 90.0 |       |         |         |
|               | CT C1    | A | 18 | 90.0 | 2  | 10.0 | 0.0   | "-0.22" | 1       |
|               |          | I | 0  | 0.0  | 0  | 0.0  |       |         |         |
|               |          | P | 3  | 15.0 | 16 | 80.0 |       |         |         |
|               | CT C2    | A | 17 | 85.0 | 4  | 20.0 | 15.0  | "-0.20" | 1       |
|               |          | I | 0  | 0.0  | 0  | 0.0  |       |         |         |
|               |          | P | 3  | 15.0 | 4  | 20.0 | 75.0  | 0.14    | 0.53    |
|               | CT C3    | A | 17 | 85.0 | 16 | 80.0 |       |         |         |
|               |          | I | 0  | 0.0  | 0  | 0.0  |       |         |         |
|               | X-ray C1 | P | 10 | 50.0 | 13 | 65.0 |       |         |         |
|               |          | A | 7  | 35.0 | 5  | 25.0 | 65.0  | 0.39    | 0.019   |
|               |          | I | 3  | 15.0 | 2  | 10.0 |       |         |         |
|               |          | P | 15 | 75.0 | 15 | 75.0 |       |         |         |
|               | X-ray C2 | A | 2  | 10.0 | 3  | 15.0 | 80.0  | 0.51    | 0.002   |
|               |          | I | 3  | 15.0 | 2  | 10.0 |       |         |         |
|               |          | P | 1  | 5.0  | 1  | 5.0  |       |         |         |
|               | X-ray C3 | A | 16 | 80.0 | 17 | 85.0 | 90.0  | 0.67    | 0.0001  |
|               |          | I | 3  | 15.0 | 2  | 10.0 |       |         |         |
|               |          | P | 13 | 65.0 | 13 | 65.0 |       |         |         |
|               | CT C1    | A | 3  | 15.0 | 5  | 25.0 | 70.0  | 0.42    | 0.008   |
|               |          | I | 4  | 20.0 | 2  | 10.0 |       |         |         |
|               |          | P | 12 | 60.0 | 16 | 80.0 |       |         |         |
|               | CT C2    | A | 4  | 20.0 | 2  | 10.0 | 80.0  | 0.58    | 0.0001  |
|               |          | I | 4  | 20.0 | 2  | 10.0 |       |         |         |
|               |          | P | 2  | 10.0 | 1  | 5.0  |       |         |         |
|               | CT C3    | A | 14 | 70.0 | 17 | 85.0 | 85.0  | 0.61    | 0.0001  |

|             |          |   |    |      |    |      |      |         |        |
|-------------|----------|---|----|------|----|------|------|---------|--------|
| TRAUMA<br>1 |          | I | 4  | 20.0 | 2  | 10.0 |      |         |        |
| TRAUMA<br>2 | X-ray C1 | P | 12 | 60.0 | 1  | 5.0  | 35.0 | “-0.10” | 0.21   |
|             |          | A | 8  | 40.0 | 19 | 95.0 |      |         |        |
|             |          | I | 0  | 0.0  | 0  | 0.0  |      |         |        |
|             | X-ray C2 | P | 11 | 55.0 | 15 | 75.0 | 80.0 | 0.58    | 0.004  |
|             |          | A | 9  | 45.0 | 5  | 25.0 |      |         |        |
|             |          | I | 0  | 0.0  | 0  | 0.0  |      |         |        |
|             | X-ray C3 | P | 4  | 20.0 | 5  | 25.0 | 85.0 | 0.57    | 0.009  |
|             |          | A | 16 | 80.0 | 15 | 75.0 |      |         |        |
|             |          | I | 0  | 0.0  | 0  | 0.0  |      |         |        |
|             | CT C1    | P | 12 | 60.0 | 1  | 5.0  | 35.0 | “-0.10” | 0.21   |
|             |          | A | 8  | 40.0 | 19 | 95.0 |      |         |        |
|             |          | I | 0  | 0.0  | 0  | 0.0  |      |         |        |
|             | CT C2    | P | 11 | 55.0 | 15 | 75.0 | 80.0 | 0.58    | 0.004  |
|             |          | A | 9  | 45.0 | 5  | 25.0 |      |         |        |
|             |          | I | 0  | 0.0  | 0  | 0.0  |      |         |        |
|             | CT C3    | P | 3  | 15.0 | 7  | 35.0 | 80.0 | 0.49    | 0.010  |
|             |          | A | 17 | 85.0 | 13 | 65.0 |      |         |        |
|             |          | I | 0  | 0.0  | 0  | 0.0  |      |         |        |
| TRAUMA<br>3 | X-ray C1 | P | 15 | 75.0 | 14 | 70.0 | 80.0 | 0.53    | 0.002  |
|             |          | A | 3  | 15.0 | 6  | 30.0 |      |         |        |
|             |          | I | 2  | 10.0 | 0  | 0.0  |      |         |        |
|             | X-ray C2 | P | 16 | 80.0 | 15 | 75.0 | 90.0 | 0.72    | 0.0001 |
|             |          | A | 3  | 15.0 | 5  | 25.0 |      |         |        |
|             |          | I | 1  | 5.0  | 0  | 0.0  |      |         |        |
|             | X-ray C3 | P | 1  | 5.0  | 1  | 5.0  | 85.0 | 0.59    | 0.001  |
|             |          | A | 16 | 80.0 | 15 | 75.0 |      |         |        |
|             |          | I | 3  | 15.0 | 4  | 20.0 |      |         |        |
|             | CT C1    | P | 15 | 75.0 | 12 | 60.0 | 50.0 | “-0.06” | 0.73   |
|             |          | A | 4  | 20.0 | 8  | 40.0 |      |         |        |
|             |          | I | 1  | 5.0  | 0  | 0.0  |      |         |        |
|             | CT C2    | P | 16 | 80.0 | 15 | 75.0 | 85.0 | 0.57    | 0.010  |
|             |          | A | 4  | 20.0 | 5  | 25.0 |      |         |        |
|             |          | I | 0  | 0.0  | 0  | 0.0  |      |         |        |
|             | CT C3    | P | 2  | 10.0 | 1  | 5.0  | 80.0 | 0.26    | 0.10   |
|             |          | A | 16 | 80.0 | 18 | 90.0 |      |         |        |
|             |          | I | 2  | 10.0 | 1  | 5.0  |      |         |        |
| TRAUMA      | X-ray C1 | P | 3  | 15.0 | 5  | 25.0 | 65.0 | 0.38    | 0.017  |
|             |          | A | 13 | 65.0 | 11 | 55.0 |      |         |        |
|             |          | I | 4  | 20.0 | 4  | 20.0 |      |         |        |
|             | X-ray C2 | P | 13 | 65.0 | 13 | 65.0 | 75.0 | 0.50    | 0.006  |
|             |          | A | 6  | 30.0 | 5  | 25.0 |      |         |        |
|             |          | I | 1  | 5.0  | 2  | 10.0 |      |         |        |
|             | X-ray C3 | P | 3  | 15.0 | 6  | 30.0 | 40.0 | 0.09    | 0.53   |
|             |          | A | 9  | 45.0 | 5  | 25.0 |      |         |        |
|             |          | I | 8  | 40.0 | 9  | 45.0 |      |         |        |
|             | CT C1    | P | 7  | 35.0 | 10 | 50.0 | 85.0 | 0.70    | 0.001  |
|             |          | A | 13 | 65.0 | 10 | 50.0 |      |         |        |
|             |          | I | 0  | 0.0  | 0  | 0.0  |      |         |        |
|             |          |   |    |      |    |      | 80.0 | 0.56    | 0.012  |

|   |       |   |    |      |    |      |      |      |              |
|---|-------|---|----|------|----|------|------|------|--------------|
| 4 | CT C2 | P | 13 | 65.0 | 13 | 65.0 | 85.0 | 0.63 | <b>0.004</b> |
|   |       | A | 7  | 35.0 | 7  | 35.0 |      |      |              |
|   |       | I | 0  | 0.0  | 0  | 0.0  |      |      |              |
|   | CT C3 | P | 5  | 25.0 | 6  | 30.0 |      |      |              |
|   |       | A | 15 | 75.0 | 14 | 70.0 |      |      |              |
|   |       | I | 0  | 0.0  | 0  | 0.0  |      |      |              |

Source: SOT-Nova, HMMC, 2022.

Legends: R1 – round 1; R2 – round 2; % – percentage; n – number of responses; X-ray – radiography; CT – computed tomography; C1 – criterion A; C2 – criterion B; C3 – criterion C; P – present; A – absent; I – inconclusive; n/a – not applicable.
